# Supplementary material for: Molecular-based upconversion in homo/heterogeneous liquids and in micro/nanostructured solid materials
Source: Royal Society of Chemistry journal article supplement (doi:10.1039/c8dt00020d), 2018-01-01
Supplement: c8dt00020d1.pdf [file c8dt00020d1.pdf]

## Molecular-based upconversion in homo/heterogeneous liquids and in micro/nanostructured solid materials

### Supplementary information

L. Latterini,<sup>a</sup> G. Massaro,<sup>a,d</sup> M. Penconi,<sup>a,e</sup> P. L. Gentili,<sup>a</sup> C. Roscini<sup>c</sup> and F. Ortica<sup>\*ab</sup>

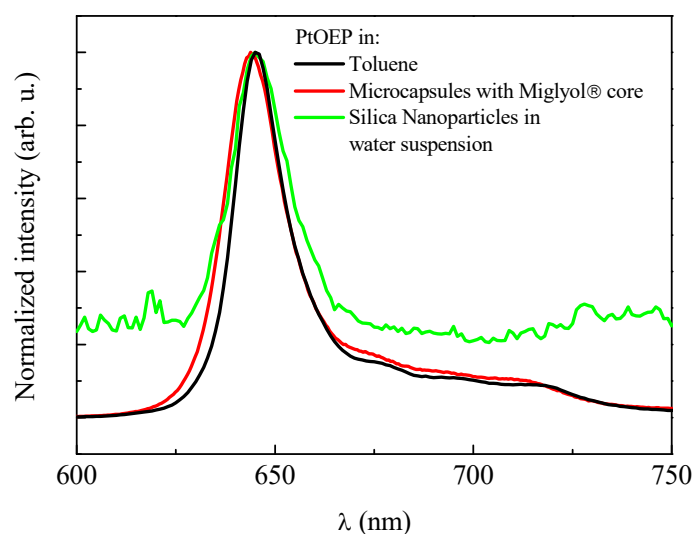

**Figure S1.** Normalized emission spectra of PtOEP in different environment. Spectra recorded in nitrogen atmosphere.  $\lambda_{\text{exc}} = 535$  nm.
